# Supplementary material for: Nasal Suctioning Therapy Among Infants With Bronchiolitis Discharged Home From the Emergency Department: A Randomized Clinical Trial
Source: PubMed Central journal article supplement (PMC10587796; doi:10.1001/jamanetworkopen.2023.37810), 2023-10-19
Supplement: jamanetwopen-e2337810-s002.pdf [file jamanetwopen-e2337810-s002.pdf]

## Supplemental Online Content

Schuh S, Coates AL, Sweeney J, et al; Pediatric Emergency Research Canada (PERC) Network. Nasal suctioning therapy among infants with bronchiolitis discharged home from the emergency department: a randomized clinical trial. *JAMA Netw Open*. 2023;6(10):e2337810. doi:10.1001/jamanetworkopen.2023.37810

**eAppendix 1.** Follow-Up Questionnaire

**eAppendix 2.** Feeding and Sleeping Adequacy Questions

**eAppendix 3.** Satisfaction With Care After Discharge

**eTable 1.** Secondary Outcomes of the Trial: Per-Protocol Analyses

**eTable 2.** Changes in Feeding and Sleeping During the Trial: Per-Protocol Analyses

This supplemental material has been provided by the authors to give readers additional information about their work.

**eAppendix 1: FOLLOW-UP QUESTIONNAIRE**

**A. RETURN VISIT**

1) Since going home from the Emergency Department (when you/your child started participating in this research study), has your child visited a doctor for bronchiolitis?

Yes [ ] No [ ]

If NO, please continue to page 2 (Section B. FEEDING)

If YES, how many times has your child visited a doctor for bronchiolitis?

**(choose only one)**

- One       Two       Three

For each visit to a doctor for bronchiolitis, please answer the following questions:

|                                                                                                                               | Visit 1                          | Visit 2                          | Visit 3                          |
|-------------------------------------------------------------------------------------------------------------------------------|----------------------------------|----------------------------------|----------------------------------|
| <u>Visit 1:</u> Did the Emergency Department doctor recommend this visit?                                                     | [ ] Yes<br>[ ] No                |                                  |                                  |
| <u>Visit 2-3:</u> Was the visit recommended by your doctor?                                                                   |                                  | [ ] Yes<br>[ ] No                | [ ] Yes<br>[ ] No                |
| Did this visit to the doctor happen because you were concerned about your child's bronchiolitis?                              | [ ] Yes<br>[ ] No                | [ ] Yes<br>[ ] No                | [ ] Yes<br>[ ] No                |
| Where did you go?<br>a. Family doctor/pediatrician<br>b. Emergency Department<br>c. Walk in Clinic<br>d. Other, specify below | [ ] a<br>[ ] b<br>[ ] c<br>[ ] d | [ ] a<br>[ ] b<br>[ ] c<br>[ ] d | [ ] a<br>[ ] b<br>[ ] c<br>[ ] d |
| If Other (d), specify                                                                                                         |                                  |                                  |                                  |

2) Since going home from our Emergency Department, has your child been admitted to a hospital (to a hospital ward) for bronchiolitis? Yes [ ] No [ ]

**B. FEEDING**

Compared to usual, how has your child fed in the past 24 hours?

*(Mark your answer by putting X on one of the circles)*

|                                                                                                                   |                                                                              |                                                                                                   |
|-------------------------------------------------------------------------------------------------------------------|------------------------------------------------------------------------------|---------------------------------------------------------------------------------------------------|
| Normal/almost normal feeding<br>(more than about 80% normal bottle intake or no/minimal difficulty breastfeeding) | Below normal but more than ½ usual bottle intake or difficulty breastfeeding | Very much less than normal<br>(less than ½ usual bottle intake or major difficulty breastfeeding) |
| <input checked="" type="radio"/>                                                                                  | <input type="radio"/>                                                        | <input type="radio"/>                                                                             |

**C. SLEEPING**

CHILD

*(Mark your answer by putting X on one of the circles)*

Compared to usual, how has your **CHILD** slept in the past 24 hours?

|                                  |                       |                          |                           |                            |
|----------------------------------|-----------------------|--------------------------|---------------------------|----------------------------|
| Very much less than normal       | Less than normal      | Normal/<br>almost normal | Somewhat more than normal | Very much more than normal |
| <input checked="" type="radio"/> | <input type="radio"/> | <input type="radio"/>    | <input type="radio"/>     | <input type="radio"/>      |

PARENT or MAIN CAREGIVER (the person who is caring for the child overnight)

Compared to usual, how have **YOU/PARENT or the MAIN CAREGIVER** slept in the past 24 hours?

|                                  |                       |                          |                           |                            |
|----------------------------------|-----------------------|--------------------------|---------------------------|----------------------------|
| Very much less than normal       | Less than normal      | Normal/<br>almost normal | Somewhat more than normal | Very much more than normal |
| <input checked="" type="radio"/> | <input type="radio"/> | <input type="radio"/>    | <input type="radio"/>     | <input type="radio"/>      |

**D. ABILITY TO CARE FOR YOUR CHILD’S ILLNESS**

*(Mark your answer by putting X on one of the circles)*

How would you or the main caregiver rate your level of satisfaction with your ability to care for your child while he/she has been sick (since the initial Emergency Department visit 3 days ago)?

|                                                                                   |                                                                                   |                                                                                   |                                                                                     |                                                                                     |
|-----------------------------------------------------------------------------------|-----------------------------------------------------------------------------------|-----------------------------------------------------------------------------------|-------------------------------------------------------------------------------------|-------------------------------------------------------------------------------------|
| Very satisfied                                                                    | Satisfied                                                                         | Neither satisfied nor dissatisfied                                                | Dissatisfied                                                                        | Very Dissatisfied                                                                   |
|  |  |  |  |  |
| <input type="radio"/>                                                             | <input type="radio"/>                                                             | <input type="radio"/>                                                             | <input type="radio"/>                                                               | <input type="radio"/>                                                               |

### E. NOSE SUCTION

1) Since going home from the Emergency Department, did you use any of the suctioning device(s) below to clean your child's nose? (check **all** that apply):

Zo-Li battery-operated nasal aspirator

Bulb nasal aspirator

Other battery-operated nasal aspirator (specify): \_\_\_\_\_

For example:

Mouth to nose human suction nasal aspirator

For example: **Hydrasense, Naspira, Nosefrida, or any other similar device.**

2) How often did you use any of the following suctioning devices in the last 3 days?

| Name of Suctioning Device              | Never                 | Rarely                | Occasionally          | Often (before most feeds) |
|----------------------------------------|-----------------------|-----------------------|-----------------------|---------------------------|
| Zo-Li nasal aspirator                  | <input type="radio"/> | <input type="radio"/> | <input type="radio"/> | <input type="radio"/>     |
| Bulb nasal aspirator                   | <input type="radio"/> | <input type="radio"/> | <input type="radio"/> | <input type="radio"/>     |
| Other battery-operated nasal aspirator | <input type="radio"/> | <input type="radio"/> | <input type="radio"/> | <input type="radio"/>     |

|                                                                                    |                                  |                                  |                                  |                                  |
|------------------------------------------------------------------------------------|----------------------------------|----------------------------------|----------------------------------|----------------------------------|
| Mouth to nose human suction nasal aspirator<br>e.g. Hydrasense, Naspira, Nosefrida | <input checked="" type="radio"/> | <input checked="" type="radio"/> | <input checked="" type="radio"/> | <input checked="" type="radio"/> |
|------------------------------------------------------------------------------------|----------------------------------|----------------------------------|----------------------------------|----------------------------------|

3) Since going home from the Emergency Department, how many days have you used this suctioning device?

Check **all** that apply:

| Name of Suctioning Device                                                          | Never                                       | Less than 1 day                             | 1-2 days                                    | More than 2 days                                                 |
|------------------------------------------------------------------------------------|---------------------------------------------|---------------------------------------------|---------------------------------------------|------------------------------------------------------------------|
| Zo-Li nasal aspirator                                                              | <input checked="" type="radio"/>            | <input checked="" type="radio"/>            | <input checked="" type="radio"/>            | <input checked="" type="radio"/>                                 |
| Bulb nasal aspirator                                                               | <input checked="" type="radio"/>            | <input checked="" type="radio"/>            | <input checked="" type="radio"/>            | <input checked="" type="radio"/>                                 |
| Other battery-operated nasal aspirator                                             | <input checked="" type="radio"/>            | <input checked="" type="radio"/>            | <input checked="" type="radio"/>            | <input checked="" type="radio"/>                                 |
| Mouth to nose human suction nasal aspirator<br>e.g. Hydrasense, Naspira, Nosefrida | <input checked="" type="radio"/>            | <input checked="" type="radio"/>            | <input checked="" type="radio"/>            | <input checked="" type="radio"/>                                 |
|                                                                                    | <i>Please continue to question number 4</i> | <i>Please continue to question number 4</i> | <i>Please continue to question number 4</i> | <i>Please skip question number 4 and go to question number 5</i> |

4) If you used the suctioning rarely, never or stopped suctioning before 3 days, what were the main reasons?

Check **all** that apply:

| Name of Suctioning Device                                                          | My child got better and did not need suctioning | Suctioning device does not help my child feed or breathe better | Suctioning device was making my child uncomfortable | Suctioning device was not suctioning properly | Other<br>(Please specify below)  |
|------------------------------------------------------------------------------------|-------------------------------------------------|-----------------------------------------------------------------|-----------------------------------------------------|-----------------------------------------------|----------------------------------|
| Zo-Li nasal aspirator                                                              | <input checked="" type="radio"/>                | <input checked="" type="radio"/>                                | <input checked="" type="radio"/>                    | <input checked="" type="radio"/>              | <input checked="" type="radio"/> |
| Bulb nasal aspirator                                                               | <input checked="" type="radio"/>                | <input checked="" type="radio"/>                                | <input checked="" type="radio"/>                    | <input checked="" type="radio"/>              | <input checked="" type="radio"/> |
| Other battery-operated nasal aspirator                                             | <input checked="" type="radio"/>                | <input checked="" type="radio"/>                                | <input checked="" type="radio"/>                    | <input checked="" type="radio"/>              | <input checked="" type="radio"/> |
| Mouth to nose human suction nasal aspirator<br>e.g. Hydrasense, Naspira, Nosefrida | <input checked="" type="radio"/>                | <input checked="" type="radio"/>                                | <input checked="" type="radio"/>                    | <input checked="" type="radio"/>              | <input checked="" type="radio"/> |

If Other, please specify:

---

---

5) Did any of the following occur immediately after the use of this device? *Check all that apply:*

|                                                                                 | Prolonged screaming more than 5 minutes | Blood dripping from the nose (active nosebleed) | Marked worsening of breathing problem | Vomiting                         | Nothing to report                | Other (Please specify below)     |
|---------------------------------------------------------------------------------|-----------------------------------------|-------------------------------------------------|---------------------------------------|----------------------------------|----------------------------------|----------------------------------|
| Zo-Li nasal aspirator                                                           | <input checked="" type="radio"/>        | <input checked="" type="radio"/>                | <input checked="" type="radio"/>      | <input checked="" type="radio"/> | <input checked="" type="radio"/> | <input checked="" type="radio"/> |
| Bulb nasal aspirator                                                            | <input checked="" type="radio"/>        | <input checked="" type="radio"/>                | <input checked="" type="radio"/>      | <input checked="" type="radio"/> | <input checked="" type="radio"/> | <input checked="" type="radio"/> |
| Other battery-operated nasal aspirator                                          | <input checked="" type="radio"/>        | <input checked="" type="radio"/>                | <input checked="" type="radio"/>      | <input checked="" type="radio"/> | <input checked="" type="radio"/> | <input checked="" type="radio"/> |
| Mouth to nose human suction nasal aspirator e.g. Hydrasense, Naspira, Nosefrida | <input checked="" type="radio"/>        | <input checked="" type="radio"/>                | <input checked="" type="radio"/>      | <input checked="" type="radio"/> | <input checked="" type="radio"/> | <input checked="" type="radio"/> |

*If you have nothing to report please go to question number 8.*

If Other, please specify:

---

---

6) If any of these problems occurred, did you see a doctor to get these problems treated?

Yes [ ] No [ ]

*If NO, please continue to question number 8*

7) If YES, what problems made you see the doctor? *Check **all** that apply:*

|  | Prolonged screaming | Blood dripping from the nose | Marked worsening of | Vomiting | Other |
|--|---------------------|------------------------------|---------------------|----------|-------|
|  |                     |                              |                     |          |       |

|                                                                                    | more than 5 minutes   | (active nosebleed)    | breathing problem     |                       | (Please specify below) |
|------------------------------------------------------------------------------------|-----------------------|-----------------------|-----------------------|-----------------------|------------------------|
| Zo-Li nasal aspirator                                                              | <input type="radio"/> | <input type="radio"/> | <input type="radio"/> | <input type="radio"/> | <input type="radio"/>  |
| Bulb nasal aspirator                                                               | <input type="radio"/> | <input type="radio"/> | <input type="radio"/> | <input type="radio"/> | <input type="radio"/>  |
| Other battery-operated nasal aspirator                                             | <input type="radio"/> | <input type="radio"/> | <input type="radio"/> | <input type="radio"/> | <input type="radio"/>  |
| Mouth to nose human suction nasal aspirator<br>e.g. Hydrasense, Naspira, Nosefrida | <input type="radio"/> | <input type="radio"/> | <input type="radio"/> | <input type="radio"/> | <input type="radio"/>  |

If Other, please specify:

---



---

8) How satisfied were you with the device you have used in the past 3 days?

(Mark your answer by putting X on one of the circles)

|                                                                                    | Very satisfied<br> | Satisfied<br> | Neither satisfied<br>Nor dissatisfied<br> | Dissatisfied<br> | Very Dissatisfied<br> |
|------------------------------------------------------------------------------------|------------------------------------------------------------------------------------------------------|-------------------------------------------------------------------------------------------------|------------------------------------------------------------------------------------------------------------------------------|------------------------------------------------------------------------------------------------------|-----------------------------------------------------------------------------------------------------------|
| Zo-Li nasal aspirator                                                              | <input type="radio"/>                                                                                | <input type="radio"/>                                                                           | <input type="radio"/>                                                                                                        | <input type="radio"/>                                                                                | <input type="radio"/>                                                                                     |
| Bulb nasal aspirator                                                               | <input type="radio"/>                                                                                | <input type="radio"/>                                                                           | <input type="radio"/>                                                                                                        | <input type="radio"/>                                                                                | <input type="radio"/>                                                                                     |
| Other battery-operated nasal aspirator                                             | <input type="radio"/>                                                                                | <input type="radio"/>                                                                           | <input type="radio"/>                                                                                                        | <input type="radio"/>                                                                                | <input type="radio"/>                                                                                     |
| Mouth to nose human suction nasal aspirator<br>e.g. Hydrasense, Naspira, Nosefrida | <input type="radio"/>                                                                                | <input type="radio"/>                                                                           | <input type="radio"/>                                                                                                        | <input type="radio"/>                                                                                | <input type="radio"/>                                                                                     |
|                                                                                    | <i>Please skip question 9 and continue to question 10</i>                                            | <i>Please skip question 9 and continue to question 10</i>                                       | <i>Please skip question 9 and continue to question 10</i>                                                                    | <i>Please continue to question number 9</i>                                                          | <i>Please continue to question number 9</i>                                                               |

9) If you are dissatisfied or very dissatisfied, what are the reasons? Check all that apply:

|                       | Noise from the suctioning device | Device was difficult/awkward to use | Excessive irritability of my baby | Poor/insufficient suctioning | Suctioning seemed too strong | Other (Please specify below) |
|-----------------------|----------------------------------|-------------------------------------|-----------------------------------|------------------------------|------------------------------|------------------------------|
| Zo-Li nasal aspirator | <input type="radio"/>            | <input type="radio"/>               | <input type="radio"/>             | <input type="radio"/>        | <input type="radio"/>        | <input type="radio"/>        |

|                                                                                       |                                  |                       |                       |                       |                       |                       |
|---------------------------------------------------------------------------------------|----------------------------------|-----------------------|-----------------------|-----------------------|-----------------------|-----------------------|
| Bulb nasal aspirator                                                                  | <input checked="" type="radio"/> | <input type="radio"/> | <input type="radio"/> | <input type="radio"/> | <input type="radio"/> | <input type="radio"/> |
| Other battery-operated nasal aspirator                                                | <input checked="" type="radio"/> | <input type="radio"/> | <input type="radio"/> | <input type="radio"/> | <input type="radio"/> | <input type="radio"/> |
| Mouth to nose human suction nasal aspirator<br>e.g. Hydrasense,<br>Naspira, Nosefrida | <input checked="" type="radio"/> | <input type="radio"/> | <input type="radio"/> | <input type="radio"/> | <input type="radio"/> | <input type="radio"/> |

If Other, please specify:

---



---

10) Will you use this same nose suctioning device again in the future?

|                                                                                       | Very much agree                  | Agree                 | Neither agree nor disagree | Disagree              | Very much disagree    |
|---------------------------------------------------------------------------------------|----------------------------------|-----------------------|----------------------------|-----------------------|-----------------------|
| Zo-Li nasal aspirator                                                                 | <input checked="" type="radio"/> | <input type="radio"/> | <input type="radio"/>      | <input type="radio"/> | <input type="radio"/> |
| Bulb nasal aspirator                                                                  | <input checked="" type="radio"/> | <input type="radio"/> | <input type="radio"/>      | <input type="radio"/> | <input type="radio"/> |
| Other battery-operated nasal aspirator                                                | <input checked="" type="radio"/> | <input type="radio"/> | <input type="radio"/>      | <input type="radio"/> | <input type="radio"/> |
| Mouth to nose human suction nasal aspirator<br>e.g. Hydrasense,<br>Naspira, Nosefrida | <input checked="" type="radio"/> | <input type="radio"/> | <input type="radio"/>      | <input type="radio"/> | <input type="radio"/> |

11) Did you use nose drops/spray with suctioning?

Yes [ ] No [ ]

(For example: Salinex that helps to clear and clean blocked nose passages)

Thank you very much for participating in this very important study and completing this follow-up questionnaire!



## **eAppendix 2: Feeding and Sleeping Adequacy Questions**

Prior to randomization and at 72 hours, the parents were asked about their infant's feeding and sleeping adequacy and their own sleeping adequacy over the past 24 hours by asking the following Likert scale questions:

### **Feeding:**

“In the past 24 hours, how has your child fed compared to usual?”

a) normal/almost normal feeding amount (more than about 80% normal bottle intake or no/minimal difficulty breastfeeding), b) below normal feeding but more than ½ usual bottle intake or some difficulty breastfeeding c) feeding very much less than normal (less than ½ usual bottle intake or major difficulty breastfeeding);

### **Sleeping:**

“In the past 24 hours, how has your child slept compared to usual?”

a) very much less than normal, b) less than normal, c) normal/almost normal, d) somewhat more than normal, e) very much more than normal.

### **Parental Sleep:**

“In the past 24 hours, how have you (the caregiver) slept compared to usual?”

a) very much less than normal, b) somewhat less than normal, c) normal/almost normal, d) somewhat more than normal, e) very much more than normal.

### **eAppendix 3: Satisfaction With Care After Discharge**

The caregivers' satisfaction with their ability to manage their child's illness was measured by their response to the following question: "How would you rate your level of satisfaction with your ability to care for your child while he/she has been sick (since the initial ED visit 3 days ago)?"

- a) very satisfied, b) satisfied, c) neither satisfied nor dissatisfied, d) dissatisfied, e) very dissatisfied.

**eTable 1. Secondary Outcomes of the Trial: Per-Protocol Analyses**

| Outcome                                             | Minimal suction<br>N=76 | Enhanced Suction<br>N=106 | Unadjusted difference<br>(95% CI) | p-value | Adjusted difference <sup>a</sup><br>(95% CI) | p-value           |
|-----------------------------------------------------|-------------------------|---------------------------|-----------------------------------|---------|----------------------------------------------|-------------------|
| All medical re-visits <sup>c</sup>                  | 17 (22.4)               | 22 (20.8)                 | 0.02(-0.11 to 0.14)               | 0.86    | 0.02(-0.09 to 0.13)                          | 0.71              |
| ED re-visits                                        | 10 (13.2)               | 13 (12.3)                 | 0.01(-0.09 to 0.11)               | 1.00    | 0.01 (-0.07to 0.09)                          | 0.80 <sup>b</sup> |
| Normal feeding at 72 hours <sup>d</sup>             | 54 (71.1)               | 74 (69.8)                 | 0.01(-0.12 to 0.15)               | 0.87    | -0.00 (-0.14 to 0.13)                        | 0.95              |
| Normal sleep at 72 hours                            | 40 (52.6)               | 49 (46.2)                 | 0.06(-0.08 to 0.21)               | 0.45    | 0.06 (-0.08 to 0.21)                         | 0.39              |
| Normal parental sleep                               | 27 (35.5)               | 45 (42.5)                 | -0.07 (-0.21 to 0.07)             | 0.36    | 0.07 (-0.07 to 0.22)                         | 0.30              |
| Satisfied with care after ED discharge <sup>e</sup> | 59 (77.6)               | 94 (88.7)                 | -0.11 (-0.00 to 0.21)             | 0.06    | 0.10 (-0.01 to 0.21)                         | 0.07              |

<sup>a</sup> Post hoc adjustment for stratification at randomization for age group, with site as a random effect.

<sup>b</sup> Based on logistic regression analysis

<sup>c</sup> Defined as any unscheduled visit for bronchiolitis to any medical facility or provider within 72 hours of ED discharge

<sup>d</sup> Defined as >80% normal fluid intake

<sup>e</sup> Defined as satisfied or very satisfied with bronchiolitis care after discharge

**eTable 2. Changes in Feeding and Sleeping During the Trial: Per-Protocol Analyses**

| Outcome                           | Minimal Suction<br>N=76 |                |                                      | Enhanced Suction<br>N=106 |               |                                      | Unadjusted                                                 |      | Adjusted                                      |      |
|-----------------------------------|-------------------------|----------------|--------------------------------------|---------------------------|---------------|--------------------------------------|------------------------------------------------------------|------|-----------------------------------------------|------|
|                                   | Baseline<br>N (%)       | 72 hr<br>N (%) | Unadjusted<br>difference<br>(95% CI) | Baseline<br>N (%)         | 72hr<br>N (%) | Unadjusted<br>difference<br>(95% CI) | Difference-<br>in-<br>differences <sup>a</sup><br>(95% CI) | P    | Difference-<br>in-<br>differences<br>(95% CI) | P    |
| <b>Normal feeding<sup>b</sup></b> | 28<br>(36.8)            | 54<br>(71.1)   | 0.34<br>(0.19 to<br>0.49)            | 34<br>(32.1)              | 74<br>(69.8)  | 0.38<br>(0.25 to<br>0.50)            | 0.04<br>(-0.16 to<br>0.23)                                 | 0.72 | 0.03<br>(-0.16 to<br>0.23)                    | 0.73 |
| <b>Normal sleeping</b>            | 15<br>(19.7)            | 40<br>(52.6)   | 0.33<br>(0.18 to<br>0.47)            | 21<br>(19.8)              | 49<br>(46.2)  | 0.26<br>(0.14 to<br>0.39)            | 0.06<br>(-0.25 to<br>0.12)                                 | 0.50 | 0.06<br>(-0.25 to<br>0.12)                    | 0.51 |
| <b>Normal parental sleep</b>      | 12<br>(15.8)            | 27<br>(35.5)   | 0.20<br>(0.06 to<br>0.33)            | 16<br>(15.1)              | 45<br>(42.5)  | 0.27<br>(0.16 to<br>0.39)            | 0.08<br>(-0.10 to<br>0.26)                                 | 0.40 | 0.08<br>(-0.10 to<br>0.25)                    | 0.41 |

<sup>a</sup> Post hoc adjustment for stratification at randomization for age group, with site as a random effect.

<sup>b</sup> Defined as >80% normal fluid intake
