# Supplementary material for: Nasal Suctioning Therapy Among Infants With Bronchiolitis Discharged Home From the Emergency Department: A Randomized Clinical Trial
Source: PubMed Central journal article supplement (PMC10587796; doi:10.1001/jamanetworkopen.2023.37810), 2023-10-19
Supplement: jamanetwopen-e2337810-s003.pdf [file jamanetwopen-e2337810-s003.pdf]

Supplemental Online Content: Nonauthor Collaborators

\*First name, last name, and suffix (if applicable) are required and will appear in PubMed.

| <b>*Group Name(s): Pediatric Emergency Research Canada (PERC) Network</b> |                   |                              |                  |                                           |                                          |                                                         |                                                                                            |
|---------------------------------------------------------------------------|-------------------|------------------------------|------------------|-------------------------------------------|------------------------------------------|---------------------------------------------------------|--------------------------------------------------------------------------------------------|
| <b>*First Name and Middle Initial(s)</b>                                  | <b>*Last Name</b> | <b>*Suffix (eg, Jr, III)</b> | Academic Degrees | Institution                               | Location (city, state/province, country) | Role or Contribution, eg, chair, principal investigator | Group (if more than 1 Group listed in the byline) and/or Subgroup (eg, Steering Committee) |
| Redjana                                                                   | Carciumaru        |                              | MD, MSc          | McMaster Children's Hospital              | Hamilton, ON, Canada                     | study coordinator                                       | PERC                                                                                       |
| Kamary                                                                    | CoriolanoDaSilva  |                              | PhD              | Schulich School of Medicine and Dentistry | London, ON, Canada                       | study coordinator                                       | PERC                                                                                       |
| Kristina                                                                  | Vogel             |                              | MSc              | Children's Hospital of Eastern Ontario    | Ottawa, ON, Canada                       | study coordinator                                       | PERC                                                                                       |
| Tanveer                                                                   | Colins            |                              | MSc              | Hospital for Sick Children                | Toronto, ON, Canada                      | database manager                                        |                                                                                            |
