# Supplementary material for: Nasal Suctioning Therapy Among Infants With Bronchiolitis Discharged Home From the Emergency Department: A Randomized Clinical Trial
Source: PubMed Central journal article supplement (PMC10587796; doi:10.1001/jamanetworkopen.2023.37810), 2023-10-19
Supplement: jamanetwopen-e2337810-s004.pdf [file jamanetwopen-e2337810-s004.pdf]

## Data Sharing Statement

Schuh. Nasal Suctioning Therapy Among Infants With Bronchiolitis Discharged Home From the Emergency Department. *JAMA Netw Open*. Published October 13, 2023.

doi:10.1001/jamanetworkopen.2023.37810

### Data

**Data available:** Yes

**Data types:** Deidentified participant data

**How to access data:** [rahim.moinedin@utoronto.ca](mailto:rahim.moinedin@utoronto.ca)

**When available:** With publication

### Supporting Documents

**Document types:** Statistical/analytic code

**How to access documents:** [rahim.moinedin@utoronto.ca](mailto:rahim.moinedin@utoronto.ca)

**When available:** With publication

### Additional Information

**Who can access the data:** Researchers whose proposed use of data has been approved for a specific study

**Types of analyses:** For a pre-specified and approved purpose

**Mechanisms of data availability:** After approval of a specific proposal and with a signed data access agreement
